# Supplementary material
Source: publisher figshare collection journal article supplement (https://acs.figshare.com/ndownloader/files/4116082)
Supplement: Supplementary file 1 [file 4116082]

 
data_cdv16 
  
_audit_creation_method            SHELXTL 
_chemical_name_systematic 
; 
 ? 
; 
_chemical_name_common             ? 
_chemical_melting_point           ? 
_chemical_formula_moiety          ? 
_chemical_formula_sum 
 'C13 H12 N2 O3' 
_chemical_formula_weight          244.25 
  
loop_ 
 _atom_type_symbol 
 _atom_type_description 
 _atom_type_scat_dispersion_real 
 _atom_type_scat_dispersion_imag 
 _atom_type_scat_source 
 'C'  'C'   0.0033   0.0016 
 'International Tables Vol C Tables 4.2.6.8 and 6.1.1.4' 
 'H'  'H'   0.0000   0.0000 
 'International Tables Vol C Tables 4.2.6.8 and 6.1.1.4' 
 'N'  'N'   0.0061   0.0033 
 'International Tables Vol C Tables 4.2.6.8 and 6.1.1.4' 
 'O'  'O'   0.0106   0.0060 
 'International Tables Vol C Tables 4.2.6.8 and 6.1.1.4' 
  
_symmetry_cell_setting            Monoclinic 
_symmetry_space_group_name_H-M    P2(1)/n 
  
loop_ 
 _symmetry_equiv_pos_as_xyz 
 'x, y, z' 
 '-x+1/2, y+1/2, -z+1/2' 
 '-x, -y, -z' 
 'x-1/2, -y-1/2, z-1/2' 
  
_cell_length_a                    10.5663(7) 
_cell_length_b                    10.9334(7) 
_cell_length_c                    11.1163(8) 
_cell_angle_alpha                 90.00 
_cell_angle_beta                  116.9766(7) 
_cell_angle_gamma                 90.00 
_cell_volume                      1144.48(13) 
_cell_formula_units_Z             4 
_cell_measurement_temperature     143(2) 
_cell_measurement_reflns_used     8506 
_cell_measurement_theta_min       2.77 
_cell_measurement_theta_max       28.23 
  
_exptl_crystal_description        irregular 
_exptl_crystal_colour             colorless 
_exptl_crystal_size_max           0.36 
_exptl_crystal_size_mid           0.21 
_exptl_crystal_size_min           0.20 
_exptl_crystal_density_meas       not_measured 
_exptl_crystal_density_diffrn     1.418 
_exptl_crystal_density_method     'not measured' 
_exptl_crystal_F_000              512 
_exptl_absorpt_coefficient_mu     0.103 
_exptl_absorpt_correction_type    multi-scan 
_exptl_absorpt_correction_T_min   0.9645 
_exptl_absorpt_correction_T_max   0.9798 
_exptl_absorpt_process_details    'Bruker SADABS' 
  
_exptl_special_details 
; 
 ? 
; 
  
_diffrn_ambient_temperature       143(2) 
_diffrn_radiation_wavelength      0.71073 
_diffrn_radiation_type            MoK\a 
_diffrn_radiation_source          'fine-focus sealed tube' 
_diffrn_radiation_monochromator   graphite 
_diffrn_measurement_device_type   'Bruker APEX-II CCD' 
_diffrn_measurement_method        '\f and \w scans' 
_diffrn_detector_area_resol_mean  ? 
_diffrn_reflns_number             12984 
_diffrn_reflns_av_R_equivalents   0.0167 
_diffrn_reflns_av_sigmaI/netI     0.0129 
_diffrn_reflns_limit_h_min        -14 
_diffrn_reflns_limit_h_max        13 
_diffrn_reflns_limit_k_min        -14 
_diffrn_reflns_limit_k_max        14 
_diffrn_reflns_limit_l_min        -14 
_diffrn_reflns_limit_l_max        14 
_diffrn_reflns_theta_min          2.21 
_diffrn_reflns_theta_max          28.50 
_reflns_number_total              2725 
_reflns_number_gt                 2479 
_reflns_threshold_expression      >2sigma(I) 
  
_computing_data_collection        'Bruker APEX2' 
_computing_cell_refinement        'Bruker SAINT' 
_computing_data_reduction         'Bruker SAINT' 
_computing_structure_solution     'SHELXS-97 (Sheldrick, 2008)' 
_computing_structure_refinement   'SHELXL-97 (Sheldrick, 2008)' 
_computing_molecular_graphics     'Bruker SHELXTL' 
_computing_publication_material   'Bruker SHELXTL' 
  
_refine_special_details 
; 
 Refinement of F^2^ against ALL reflections.  The weighted R-factor wR and 
 goodness of fit S are based on F^2^, conventional R-factors R are based 
 on F, with F set to zero for negative F^2^. The threshold expression of 
 F^2^ > 2sigma(F^2^) is used only for calculating R-factors(gt) etc. and is 
 not relevant to the choice of reflections for refinement.  R-factors based 
 on F^2^ are statistically about twice as large as those based on F, and R- 
 factors based on ALL data will be even larger. 
; 
  
_refine_ls_structure_factor_coef  Fsqd 
_refine_ls_matrix_type            full 
_refine_ls_weighting_scheme       calc 
_refine_ls_weighting_details 
 'calc w=1/[\s^2^(Fo^2^)+(0.0501P)^2^+0.4692P] where P=(Fo^2^+2Fc^2^)/3' 
_atom_sites_solution_primary      direct 
_atom_sites_solution_secondary    difmap 
_atom_sites_solution_hydrogens    difmap 
_refine_ls_hydrogen_treatment     refall 
_refine_ls_extinction_method      none 
_refine_ls_extinction_coef        ? 
_refine_ls_number_reflns          2725 
_refine_ls_number_parameters      211 
_refine_ls_number_restraints      0 
_refine_ls_R_factor_all           0.0398 
_refine_ls_R_factor_gt            0.0364 
_refine_ls_wR_factor_ref          0.0969 
_refine_ls_wR_factor_gt           0.0940 
_refine_ls_goodness_of_fit_ref    1.048 
_refine_ls_restrained_S_all       1.048 
_refine_ls_shift/su_max           0.001 
_refine_ls_shift/su_mean          0.000 
  
 _iucr_refine_instructions_details 
  
; 
TITL cdv16 in P2(1)/n 
CELL 0.71073  10.5663  10.9334  11.1163  90.000 116.9766  90.000 
ZERR    4.00   0.0007   0.0007   0.0008   0.000   0.0007   0.000 
LATT  1 
SYMM 0.5-X, 0.5+Y, 0.5-Z 
SFAC C H N O 
UNIT 52 48 8 12 
TEMP -130.000 
SIZE 0.20 0.214 0.355 
  
rem Yvonne Schmidt 20s ccd2 
rem APEX2 2011.4-1, SAINT 7.68a, SADABS 2008/1, SHELXTL 2008/4 
  
L.S. 16 
ACTA 51 
CONF 
BOND $H 
  
WGHT    0.050100    0.469200 
FVAR       0.26991 
O1    4    0.229772    0.001465    1.231595    11.00000    0.02873    0.02153 = 
         0.01981    0.00689    0.00846    0.00312 
O2    4    0.324994    0.534488    0.934730    11.00000    0.03483    0.01857 = 
         0.04232   -0.00296    0.01984   -0.00797 
O3    4    0.350034    0.414306    0.792017    11.00000    0.03784    0.04108 = 
         0.03404   -0.00258    0.02580   -0.01185 
N1    3    0.172076    0.198126    1.149599    11.00000    0.01735    0.01662 = 
         0.01278    0.00095    0.00696   -0.00031 
N2    3    0.297065    0.440944    0.866818    11.00000    0.02192    0.02058 = 
         0.02254    0.00452    0.01000   -0.00215 
C1    1    0.187644    0.073252    1.137274    11.00000    0.01507    0.01802 = 
         0.01815    0.00194    0.00716   -0.00012 
C2    1    0.142205    0.047528    0.992770    11.00000    0.01953    0.01587 = 
         0.01772   -0.00073    0.00907   -0.00100 
C3    1    0.082850    0.147391    0.920919    11.00000    0.01494    0.01589 = 
         0.01599   -0.00187    0.00780   -0.00306 
C4    1    0.026280    0.176958    0.775404    11.00000    0.01897    0.01717 = 
         0.01447   -0.00055    0.00738   -0.00096 
C5    1    0.125938    0.269349    0.754081    11.00000    0.02047    0.01778 = 
         0.01504    0.00107    0.00946    0.00088 
C6    1    0.196357    0.351790    0.875435    11.00000    0.01649    0.01453 = 
         0.01903    0.00270    0.00792    0.00010 
C7    1    0.184299    0.350582    0.989278    11.00000    0.01633    0.01282 = 
         0.01678    0.00088    0.00584    0.00072 
C8    1    0.097154    0.252721    1.014056    11.00000    0.01621    0.01542 = 
         0.01280    0.00072    0.00601   -0.00002 
C9    1   -0.034639    0.306551    1.014935    11.00000    0.01667    0.01872 = 
         0.02014   -0.00052    0.00745    0.00129 
C10   1   -0.025373    0.300391    1.137780    11.00000    0.02114    0.02338 = 
         0.02457   -0.00238    0.01336    0.00100 
C11   1    0.110712    0.241378    1.237714    11.00000    0.02338    0.02295 = 
         0.01584   -0.00092    0.01136   -0.00057 
C12   1    0.040187    0.342160    0.627161    11.00000    0.02685    0.01994 = 
         0.01877    0.00309    0.00892    0.00002 
C13   1    0.052022    0.331283    0.514883    11.00000    0.05743    0.02811 = 
         0.02011    0.00516    0.01755    0.00507 
H2    2    0.151155   -0.029968    0.960342    11.00000    0.02286 
H4A   2   -0.069054    0.215484    0.744025    11.00000    0.02045 
H4B   2    0.018606    0.105480    0.721504    11.00000    0.02052 
H5    2    0.201201    0.224373    0.742274    11.00000    0.02177 
H7    2    0.231600    0.409034    1.057237    11.00000    0.02056 
H9    2   -0.108579    0.345455    0.936136    11.00000    0.02479 
H10   2   -0.095544    0.331779    1.163278    11.00000    0.02823 
H11A  2    0.171728    0.300869    1.303303    11.00000    0.02067 
H11B  2    0.099328    0.169768    1.287008    11.00000    0.02418 
H12   2   -0.029176    0.397517    0.631538    11.00000    0.03160 
H13A  2    0.120307    0.275050    0.506531    11.00000    0.04856 
H13B  2   -0.006465    0.374882    0.437053    11.00000    0.04684 
HKLF 4 
  
REM  cdv16 in P2(1)/n 
REM R1 =  0.0364 for   2479 Fo > 4sig(Fo)  and  0.0398 for all   2725 data 
REM    211 parameters refined using      0 restraints 
  
END 
  
WGHT      0.0501      0.4692 
REM Highest difference peak  0.369,  deepest hole -0.226,  1-sigma level  0.044 
Q1    1   0.0848  0.1988  0.9622  11.00000  0.05    0.37 
Q2    1   0.1661  0.0576  1.0616  11.00000  0.05    0.35 
Q3    1   0.1413  0.3007  0.9999  11.00000  0.05    0.35 
Q4    1   0.0827  0.3019  0.6875  11.00000  0.05    0.33 
Q5    1   0.0372  0.2689  1.1867  11.00000  0.05    0.31 
Q6    1   0.1637  0.3062  0.8204  11.00000  0.05    0.31 
Q7    1   0.0258  0.2795  1.0042  11.00000  0.05    0.30 
Q8    1   0.0531  0.1550  0.8489  11.00000  0.05    0.30 
Q9    1   0.1393  0.2196  1.1908  11.00000  0.05    0.29 
Q10   1   0.0787  0.2231  0.7647  11.00000  0.05    0.29 
Q11   1   0.1349  0.2309  1.0839  11.00000  0.05    0.28 
Q12   1   0.1660  0.3635  0.9143  11.00000  0.05    0.27 
Q13   1   0.2180  0.3253  0.9416  11.00000  0.05    0.27 
Q14   1   0.0783  0.0852  0.9446  11.00000  0.05    0.26 
Q15   1   0.1640  0.1382  1.1392  11.00000  0.05    0.26 
Q16   1   0.2413  0.3908  0.8687  11.00000  0.05    0.24 
Q17   1  -0.0382  0.2789  1.0704  11.00000  0.05    0.23 
Q18   1  -0.0035  0.3282  1.0894  11.00000  0.05    0.22 
Q19   1   0.2964  0.4624  0.7793  11.00000  0.05    0.22 
Q20   1   0.1309  0.1037  0.9541  11.00000  0.05    0.21 
  
; 
  
loop_ 
 _atom_site_label 
 _atom_site_type_symbol 
 _atom_site_fract_x 
 _atom_site_fract_y 
 _atom_site_fract_z 
 _atom_site_U_iso_or_equiv 
 _atom_site_adp_type 
 _atom_site_occupancy 
 _atom_site_symmetry_multiplicity 
 _atom_site_calc_flag 
 _atom_site_refinement_flags 
 _atom_site_disorder_assembly 
 _atom_site_disorder_group 
O1 O 0.22977(9) 0.00146(8) 1.23160(8) 0.0243(2) Uani 1 1 d . . . 
O2 O 0.32499(10) 0.53449(8) 0.93473(10) 0.0310(2) Uani 1 1 d . . . 
O3 O 0.35003(11) 0.41431(10) 0.79202(10) 0.0340(2) Uani 1 1 d . . . 
N1 N 0.17208(9) 0.19813(8) 1.14960(9) 0.01554(19) Uani 1 1 d . . . 
N2 N 0.29707(10) 0.44094(9) 0.86682(10) 0.0217(2) Uani 1 1 d . . . 
C1 C 0.18764(11) 0.07325(10) 1.13727(11) 0.0172(2) Uani 1 1 d . . . 
C2 C 0.14221(11) 0.04753(10) 0.99277(11) 0.0175(2) Uani 1 1 d . . . 
C3 C 0.08285(11) 0.14739(9) 0.92092(10) 0.0153(2) Uani 1 1 d . . . 
C4 C 0.02628(12) 0.17696(10) 0.77540(10) 0.0170(2) Uani 1 1 d . . . 
C5 C 0.12594(11) 0.26935(10) 0.75408(10) 0.0172(2) Uani 1 1 d . . . 
C6 C 0.19636(11) 0.35179(9) 0.87544(11) 0.0167(2) Uani 1 1 d . . . 
C7 C 0.18430(11) 0.35058(9) 0.98928(11) 0.0159(2) Uani 1 1 d . . . 
C8 C 0.09715(11) 0.25272(9) 1.01406(10) 0.0150(2) Uani 1 1 d . . . 
C9 C -0.03464(11) 0.30655(10) 1.01493(11) 0.0189(2) Uani 1 1 d . . . 
C10 C -0.02537(12) 0.30039(11) 1.13778(12) 0.0219(2) Uani 1 1 d . . . 
C11 C 0.11071(12) 0.24138(11) 1.23771(11) 0.0198(2) Uani 1 1 d . . . 
C12 C 0.04019(13) 0.34216(11) 0.62716(12) 0.0224(2) Uani 1 1 d . . . 
C13 C 0.05202(18) 0.33128(13) 0.51488(13) 0.0352(3) Uani 1 1 d . . . 
H2 H 0.1512(15) -0.0300(14) 0.9603(14) 0.023(3) Uiso 1 1 d . . . 
H4A H -0.0691(16) 0.2155(13) 0.7440(14) 0.020(3) Uiso 1 1 d . . . 
H4B H 0.0186(15) 0.1055(14) 0.7215(14) 0.021(3) Uiso 1 1 d . . . 
H5 H 0.2012(15) 0.2244(14) 0.7423(14) 0.022(3) Uiso 1 1 d . . . 
H7 H 0.2316(15) 0.4090(14) 1.0572(14) 0.021(3) Uiso 1 1 d . . . 
H9 H -0.1086(16) 0.3455(14) 0.9361(15) 0.025(4) Uiso 1 1 d . . . 
H10 H -0.0955(16) 0.3318(15) 1.1633(15) 0.028(4) Uiso 1 1 d . . . 
H11A H 0.1717(15) 0.3009(14) 1.3033(14) 0.021(3) Uiso 1 1 d . . . 
H11B H 0.0993(15) 0.1698(14) 1.2870(14) 0.024(4) Uiso 1 1 d . . . 
H12 H -0.0292(17) 0.3975(16) 0.6315(15) 0.032(4) Uiso 1 1 d . . . 
H13A H 0.120(2) 0.2751(18) 0.5065(19) 0.049(5) Uiso 1 1 d . . . 
H13B H -0.006(2) 0.3749(18) 0.4371(19) 0.047(5) Uiso 1 1 d . . . 
  
loop_ 
 _atom_site_aniso_label 
 _atom_site_aniso_U_11 
 _atom_site_aniso_U_22 
 _atom_site_aniso_U_33 
 _atom_site_aniso_U_23 
 _atom_site_aniso_U_13 
 _atom_site_aniso_U_12 
O1 0.0287(4) 0.0215(4) 0.0198(4) 0.0069(3) 0.0085(3) 0.0031(3) 
O2 0.0348(5) 0.0186(4) 0.0423(5) -0.0030(4) 0.0198(4) -0.0080(4) 
O3 0.0378(5) 0.0411(5) 0.0340(5) -0.0026(4) 0.0258(4) -0.0119(4) 
N1 0.0174(4) 0.0166(4) 0.0128(4) 0.0009(3) 0.0070(3) -0.0003(3) 
N2 0.0219(5) 0.0206(5) 0.0225(5) 0.0045(4) 0.0100(4) -0.0021(4) 
C1 0.0151(5) 0.0180(5) 0.0182(5) 0.0019(4) 0.0072(4) -0.0001(4) 
C2 0.0195(5) 0.0159(5) 0.0177(5) -0.0007(4) 0.0091(4) -0.0010(4) 
C3 0.0149(5) 0.0159(5) 0.0160(5) -0.0019(4) 0.0078(4) -0.0031(4) 
C4 0.0190(5) 0.0172(5) 0.0145(5) -0.0005(4) 0.0074(4) -0.0010(4) 
C5 0.0205(5) 0.0178(5) 0.0150(5) 0.0011(4) 0.0095(4) 0.0009(4) 
C6 0.0165(5) 0.0145(5) 0.0190(5) 0.0027(4) 0.0079(4) 0.0001(4) 
C7 0.0163(5) 0.0128(5) 0.0168(5) 0.0009(4) 0.0058(4) 0.0007(4) 
C8 0.0162(5) 0.0154(5) 0.0128(4) 0.0007(4) 0.0060(4) 0.0000(4) 
C9 0.0167(5) 0.0187(5) 0.0201(5) -0.0005(4) 0.0074(4) 0.0013(4) 
C10 0.0211(5) 0.0234(6) 0.0246(6) -0.0024(4) 0.0134(5) 0.0010(4) 
C11 0.0234(5) 0.0229(5) 0.0158(5) -0.0009(4) 0.0114(4) -0.0006(4) 
C12 0.0269(6) 0.0199(5) 0.0188(5) 0.0031(4) 0.0089(5) 0.0000(4) 
C13 0.0574(9) 0.0281(7) 0.0201(6) 0.0052(5) 0.0175(6) 0.0051(6) 
  
_geom_special_details 
; 
 All esds (except the esd in the dihedral angle between two l.s. planes) 
 are estimated using the full covariance matrix.  The cell esds are taken 
 into account individually in the estimation of esds in distances, angles 
 and torsion angles; correlations between esds in cell parameters are only 
 used when they are defined by crystal symmetry.  An approximate (isotropic) 
 treatment of cell esds is used for estimating esds involving l.s. planes. 
; 
  
loop_ 
 _geom_bond_atom_site_label_1 
 _geom_bond_atom_site_label_2 
 _geom_bond_distance 
 _geom_bond_site_symmetry_2 
 _geom_bond_publ_flag 
O1 C1 1.2207(13) . ? 
O2 N2 1.2251(14) . ? 
O3 N2 1.2295(13) . ? 
N1 C1 1.3894(14) . ? 
N1 C8 1.4735(13) . ? 
N1 C11 1.4764(13) . ? 
N2 C6 1.4779(14) . ? 
C1 C2 1.4800(15) . ? 
C2 C3 1.3300(15) . ? 
C2 H2 0.942(15) . ? 
C3 C4 1.4836(14) . ? 
C3 C8 1.5096(14) . ? 
C4 C5 1.5530(15) . ? 
C4 H4A 0.998(15) . ? 
C4 H4B 0.966(15) . ? 
C5 C6 1.5084(15) . ? 
C5 C12 1.5118(15) . ? 
C5 H5 0.993(15) . ? 
C6 C7 1.3282(15) . ? 
C7 C8 1.5161(14) . ? 
C7 H7 0.941(15) . ? 
C8 C9 1.5159(15) . ? 
C9 C10 1.3258(16) . ? 
C9 H9 0.968(15) . ? 
C10 C11 1.5062(16) . ? 
C10 H10 0.969(16) . ? 
C11 H11A 0.972(15) . ? 
C11 H11B 0.994(15) . ? 
C12 C13 1.3150(18) . ? 
C12 H12 0.969(17) . ? 
C13 H13A 0.98(2) . ? 
C13 H13B 0.93(2) . ? 
  
loop_ 
 _geom_angle_atom_site_label_1 
 _geom_angle_atom_site_label_2 
 _geom_angle_atom_site_label_3 
 _geom_angle 
 _geom_angle_site_symmetry_1 
 _geom_angle_site_symmetry_3 
 _geom_angle_publ_flag 
C1 N1 C8 109.27(8) . . ? 
C1 N1 C11 119.17(9) . . ? 
C8 N1 C11 110.78(8) . . ? 
O2 N2 O3 123.93(10) . . ? 
O2 N2 C6 119.34(10) . . ? 
O3 N2 C6 116.72(10) . . ? 
O1 C1 N1 124.09(10) . . ? 
O1 C1 C2 128.50(10) . . ? 
N1 C1 C2 107.41(9) . . ? 
C3 C2 C1 109.16(9) . . ? 
C3 C2 H2 127.6(9) . . ? 
C1 C2 H2 123.1(9) . . ? 
C2 C3 C4 132.89(10) . . ? 
C2 C3 C8 109.95(9) . . ? 
C4 C3 C8 116.55(9) . . ? 
C3 C4 C5 110.02(9) . . ? 
C3 C4 H4A 108.5(8) . . ? 
C5 C4 H4A 108.6(8) . . ? 
C3 C4 H4B 112.3(8) . . ? 
C5 C4 H4B 107.7(8) . . ? 
H4A C4 H4B 109.7(12) . . ? 
C6 C5 C12 111.32(9) . . ? 
C6 C5 C4 110.23(8) . . ? 
C12 C5 C4 108.91(9) . . ? 
C6 C5 H5 108.3(8) . . ? 
C12 C5 H5 108.3(8) . . ? 
C4 C5 H5 109.7(9) . . ? 
C7 C6 N2 116.83(10) . . ? 
C7 C6 C5 128.65(10) . . ? 
N2 C6 C5 114.44(9) . . ? 
C6 C7 C8 120.58(10) . . ? 
C6 C7 H7 120.8(9) . . ? 
C8 C7 H7 118.6(8) . . ? 
N1 C8 C3 103.44(8) . . ? 
N1 C8 C9 102.69(8) . . ? 
C3 C8 C9 119.61(9) . . ? 
N1 C8 C7 112.51(8) . . ? 
C3 C8 C7 107.09(8) . . ? 
C9 C8 C7 111.26(9) . . ? 
C10 C9 C8 110.37(10) . . ? 
C10 C9 H9 127.3(9) . . ? 
C8 C9 H9 122.1(9) . . ? 
C9 C10 C11 112.41(10) . . ? 
C9 C10 H10 125.1(9) . . ? 
C11 C10 H10 122.5(9) . . ? 
N1 C11 C10 101.98(8) . . ? 
N1 C11 H11A 111.8(8) . . ? 
C10 C11 H11A 110.7(9) . . ? 
N1 C11 H11B 108.2(9) . . ? 
C10 C11 H11B 115.5(9) . . ? 
H11A C11 H11B 108.6(12) . . ? 
C13 C12 C5 124.29(12) . . ? 
C13 C12 H12 120.3(9) . . ? 
C5 C12 H12 115.4(9) . . ? 
C12 C13 H13A 122.4(11) . . ? 
C12 C13 H13B 121.7(12) . . ? 
H13A C13 H13B 115.9(15) . . ? 
  
loop_ 
 _geom_torsion_atom_site_label_1 
 _geom_torsion_atom_site_label_2 
 _geom_torsion_atom_site_label_3 
 _geom_torsion_atom_site_label_4 
 _geom_torsion 
 _geom_torsion_site_symmetry_1 
 _geom_torsion_site_symmetry_2 
 _geom_torsion_site_symmetry_3 
 _geom_torsion_site_symmetry_4 
 _geom_torsion_publ_flag 
C8 N1 C1 O1 -170.60(10) . . . . ? 
C11 N1 C1 O1 -41.88(15) . . . . ? 
C8 N1 C1 C2 8.48(11) . . . . ? 
C11 N1 C1 C2 137.20(9) . . . . ? 
O1 C1 C2 C3 170.07(11) . . . . ? 
N1 C1 C2 C3 -8.95(12) . . . . ? 
C1 C2 C3 C4 176.15(11) . . . . ? 
C1 C2 C3 C8 5.66(12) . . . . ? 
C2 C3 C4 C5 -109.07(13) . . . . ? 
C8 C3 C4 C5 60.92(12) . . . . ? 
C3 C4 C5 C6 -31.14(12) . . . . ? 
C3 C4 C5 C12 -153.54(9) . . . . ? 
O2 N2 C6 C7 -25.93(15) . . . . ? 
O3 N2 C6 C7 152.80(11) . . . . ? 
O2 N2 C6 C5 156.98(10) . . . . ? 
O3 N2 C6 C5 -24.29(14) . . . . ? 
C12 C5 C6 C7 122.55(12) . . . . ? 
C4 C5 C6 C7 1.57(15) . . . . ? 
C12 C5 C6 N2 -60.79(12) . . . . ? 
C4 C5 C6 N2 178.24(9) . . . . ? 
N2 C6 C7 C8 -172.76(9) . . . . ? 
C5 C6 C7 C8 3.84(17) . . . . ? 
C1 N1 C8 C3 -5.11(11) . . . . ? 
C11 N1 C8 C3 -138.34(9) . . . . ? 
C1 N1 C8 C9 119.96(9) . . . . ? 
C11 N1 C8 C9 -13.27(11) . . . . ? 
C1 N1 C8 C7 -120.33(9) . . . . ? 
C11 N1 C8 C7 106.44(10) . . . . ? 
C2 C3 C8 N1 -0.55(11) . . . . ? 
C4 C3 C8 N1 -172.77(8) . . . . ? 
C2 C3 C8 C9 -113.86(11) . . . . ? 
C4 C3 C8 C9 73.92(12) . . . . ? 
C2 C3 C8 C7 118.48(10) . . . . ? 
C4 C3 C8 C7 -53.74(11) . . . . ? 
C6 C7 C8 N1 133.19(10) . . . . ? 
C6 C7 C8 C3 20.19(13) . . . . ? 
C6 C7 C8 C9 -112.21(11) . . . . ? 
N1 C8 C9 C10 8.41(12) . . . . ? 
C3 C8 C9 C10 122.12(11) . . . . ? 
C7 C8 C9 C10 -112.17(11) . . . . ? 
C8 C9 C10 C11 -0.60(14) . . . . ? 
C1 N1 C11 C10 -115.16(10) . . . . ? 
C8 N1 C11 C10 12.86(11) . . . . ? 
C9 C10 C11 N1 -7.44(13) . . . . ? 
C6 C5 C12 C13 128.33(13) . . . . ? 
C4 C5 C12 C13 -109.93(14) . . . . ? 
  
_diffrn_measured_fraction_theta_max    0.939 
_diffrn_reflns_theta_full              25.50 
_diffrn_measured_fraction_theta_full   0.999 
_refine_diff_density_max    0.369 
_refine_diff_density_min   -0.226 
_refine_diff_density_rms    0.044 
